# Supplementary material
Source: publisher site journal article supplement (https://www.dovepress.com/article/490330)
Supplement: Supplementary file 1 [file get_supplementary_file.php]

**Supplementary Table 1.** Recovery rates overall and by individual domainsfor elderly patients undergoing colonoscopy.

|  | Remimazolam  (*n* = 114) | Propofol  (*n* = 114) | Abosolute difference  (95% CI) | Odd ratio  (95% CI) | p value |
| --- | --- | --- | --- | --- | --- |
| *n* (%) | |
| Recovery at 30 min |  |  |  |  |  |
| Cognitive | 64 (56.1%) | 68 (59.6%) | -0.04 (-0.16 to 0.09) | 0.87 (0.51 to 1.47) | 0.592 |
| Nociceptive | 95 (83.3%) | 98 (86.0%) | -0.03 (-0.12 to 0.07) | 0.82 (0.40 to 1.68) | 0.582 |
| Emotion | 97 (85.1%) | 96 (84.2%) | 0.01 (-0.08 to 0.10) | 1.07 (0.52 to 2.20) | 0.854 |
| Physiological | 111 (97.4%) | 109 (95.6%) | 0.02 (0.03 to 0.07) | 1.70 (0.40 to 7.28) | 0.476 |
| Overall | 51 (44.7%) | 54 (47.4%) | -0.03 (-0.16 to 0.10) | 0.90 (0.53 to 1.51) | 0.690 |
| Recovery on Day 1 |  |  |  |  |  |
| Cognitive | 88 (77.2%) | 88 (77.2%) | 0 (-0.11 to 0.11) | 1.00 (0.54 to 1.86) | > 0.99 |
| ADL | 110 (96.5%) | 109 (95.6%) | 0 (-0.04 to 0.06) | 1.26 (0.33 to 4.82) | 0.734 |
| Nociceptive | 109 (95.6%) | 111 (97.4%) | -0.02 (-0.07 to 0.03) | 0.59 (0.14 to 2.53) | 0.476 |
| Emotion | 102 (89.5%) | 99 (86.8%) | 0.03 (-0.06 to 0.11) | 1.29 (0.57 to 2.89) | 0.539 |
| Overall | 78 (68.4%) | 75 (65.8%) | 0.03 (-0.10 to 0.15) | 1.13 (0.65 to1.96) | 0.672 |
| Recovery on Day 3 |  |  |  |  |  |
| Cognitive | 96 (84.2%) | 97 (85.1%) | -0.01 (-0.10 to 0.08) | 0.93 (0.45 to 1.92) | 0.854 |
| ADL | 112 (98.2%) | 111 (97.4%) | 0 (-0.03 to 0.05) | 1.51 (0.25 to 9.23) | 0.653 |
| Nociceptive | 112 (98.2%) | 114 (100.0%) | -0.02 (-0.04 to 0) | 0 (0 to +∞) | > 0.99 |
| Emotion | 108 (94.7%) | 103 (90.4%) | 0.04 (-0.02 to 0.11) | 1.92 (0.69 to 5.39) | 0.214 |
| Overall | 90 (78.9%) | 87 (76.3%) | 0.03 (-0.08 to 0.13) | 1.16 (0.62 to 2.17) | 0.634 |
| Recovery on Day 7 |  |  |  |  |  |
| Cognitive | 108 (94.7%) | 102 (89.5%) | 0.05 (-0.02 to 0.12) | 2.12 (0.77 to 5.85) | 0.148 |
| ADL | 113 (99.1%) | 112 (98.2%) | 0 (-0.02 to 0.04) | 2.02 (0.18 to 22.57) | 0.569 |
| Nociceptive | 112 (98.2%) | 100 (100.0%) | -0.02 (-0.04 to 0) | 0 (0 to +∞) | > 0.99 |
| Emotion | 112 (98.2%) | 110 (96.5%) | 0.02 (-0.02 to 0.06) | 2.04 (0.37 to 11.34) | 0.417 |
| Overall | 104 (91.2%) | 97 (85.1%) | 0.06 (-0.02 to 0.15) | 1.82 (0.80 to 4.17) | 0.156 |

Note: Risk differences and odd ratio are unadjusted estimates.

Abbreviations: ADL, activities of daily living; CI, confidence interval.


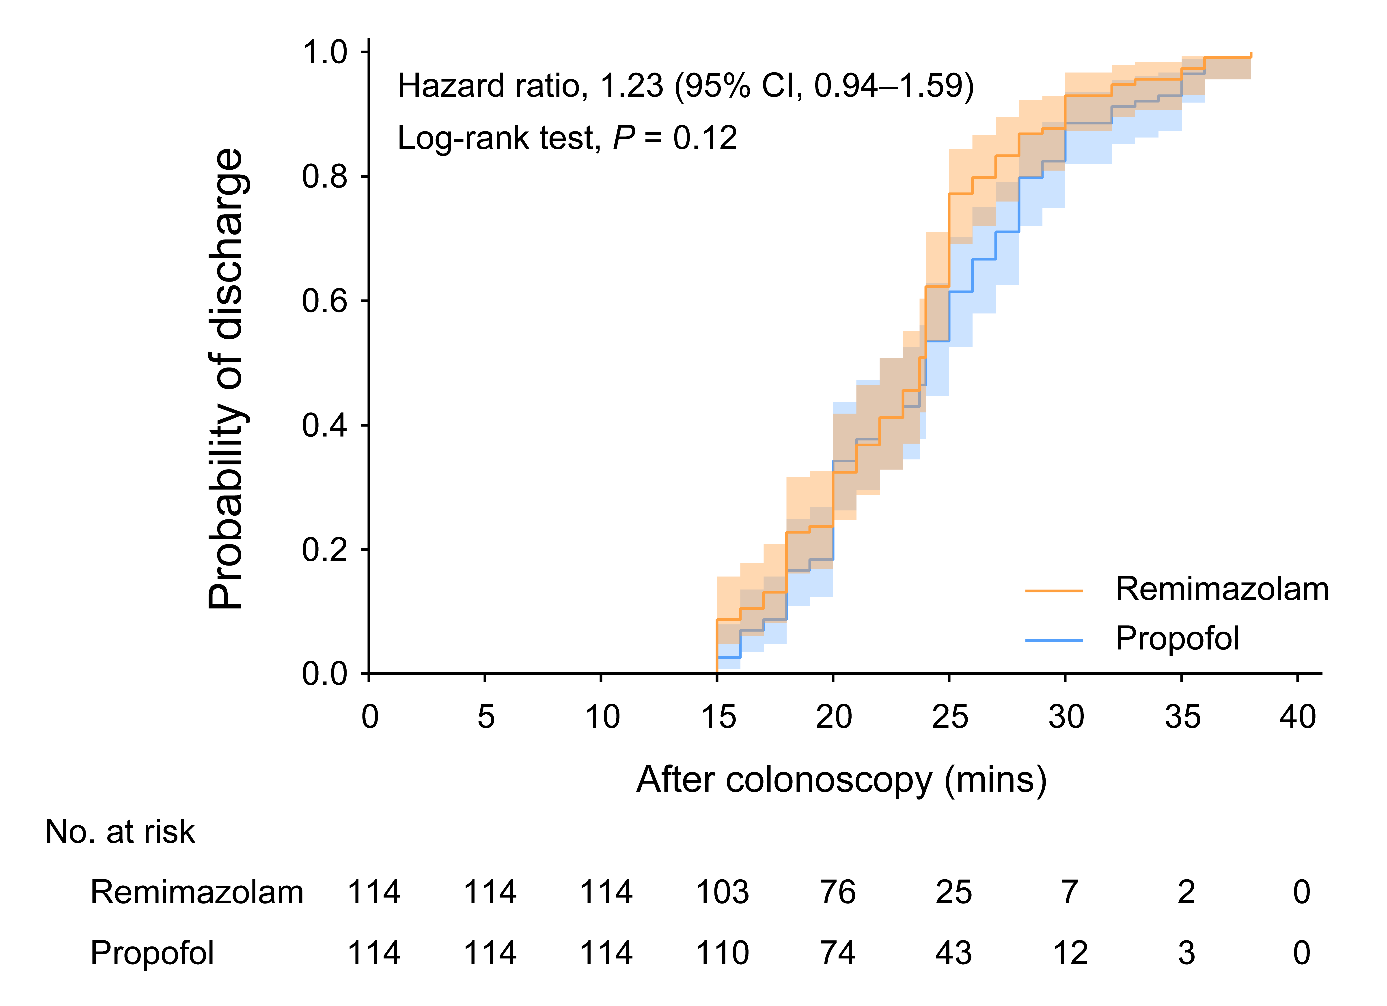


**Supplementary Figure 1.** Kaplan-Meier curves for discharge time based on Modified Postanesthesia Discharge Scoring System (PADSS) score ≥ 9.

Note: Cumulative discharge probability over time was analyzed using Kaplan-Meier survival analysis. The log-rank test was used to compare time-to-event distributions between groups. Hazard ratios with 95% confidence intervals were calculated using a Cox proportional hazards model. Median time to discharge readiness was similar between groups (remimazolam: 23.7 min, 95% CI: 23.0–24.0; propofol: 24.0 min, 95% CI: 23.0–25.0; Hazard ratio: 1.23, 95% CI: 0.94–1.59; log-rank p = 0.120). No significant differences were observed between the remimazolam and propofol groups.

Abbreviations: CI, confidence interval; PADSS, Modified Postanesthesia Discharge Scoring System.
